# Supplementary material for: Screening of neuraminidase inhibitors from the leaves of Syringa velutina Kom. via compound fractionation and in vitro activity evaluation
Source: Royal Society of Chemistry journal article supplement (doi:10.1039/c6ay02922a), 2016-12-14
Supplement: c6ay02922a1.pdf [file c6ay02922a1.pdf]

**Fig. S1** Photograph of the hyphenation of circulated ultrasound-assisted extraction (CUAE), solvent concentration tank (SCT), centrifugal partition chromatography (CPC), and ultra-high performance liquid chromatography (UPLC)/PDA.

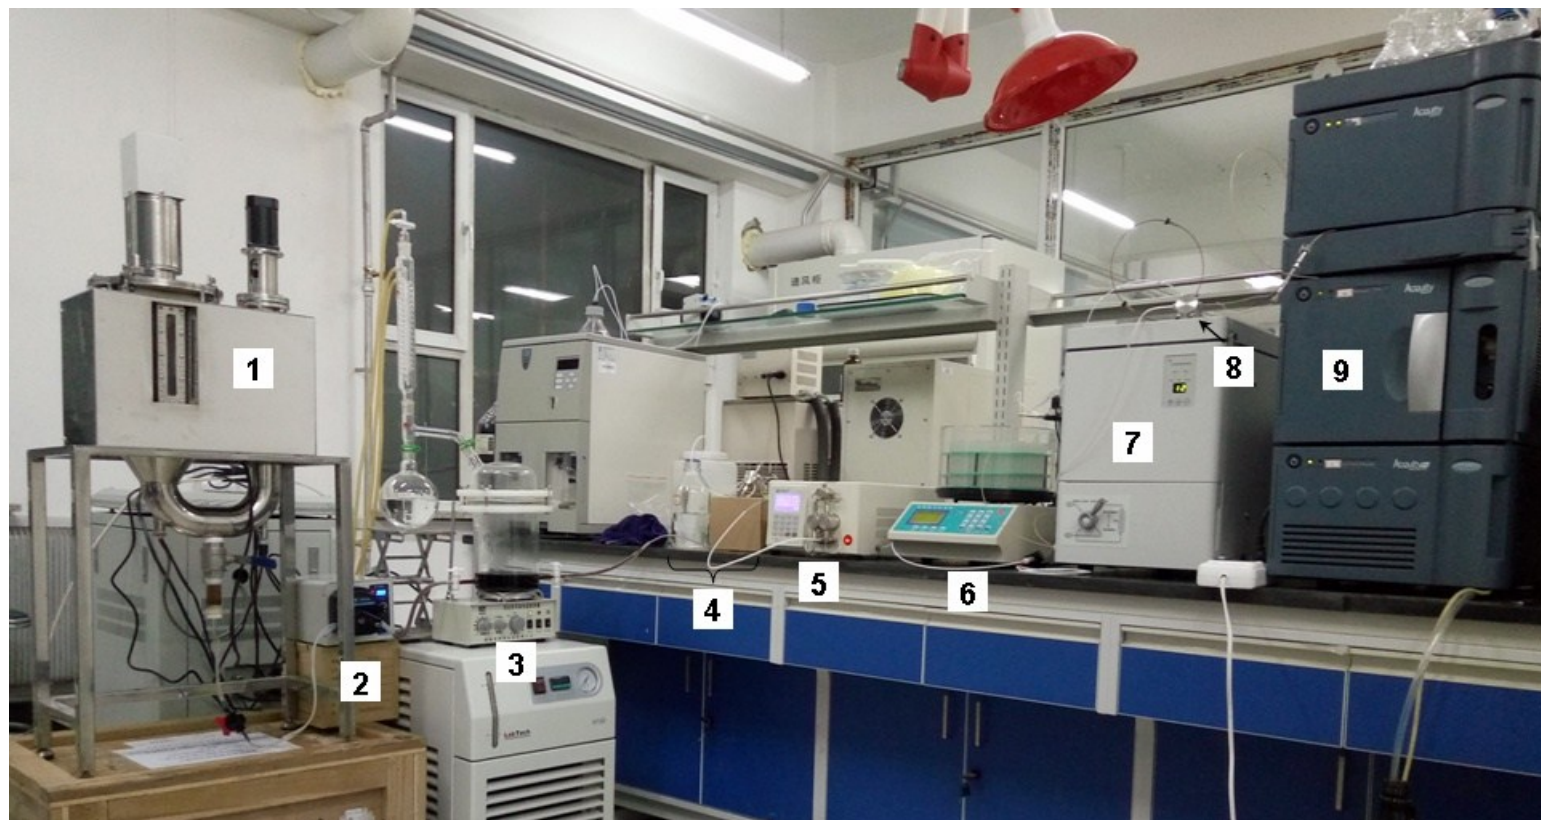

1: circulated ultrasound-assisted extraction (CUAE); 2: pump 1; 3: solvent concentration tank (SCT); 4: mobile phase bottle and the left six-port valve; 5: pump 3; 6: fraction collector; 7: centrifugal partition chromatography (CPC); 8: the right six-port valve; 9: ultra-high performance liquid chromatography couple with PDA detector (UPLC/PDA).

**Fig. S2** Dose-dependent curves of chlorogenic acid, oleuropein aglycone, dicaffeoylquinic acid, syringin and rutin.

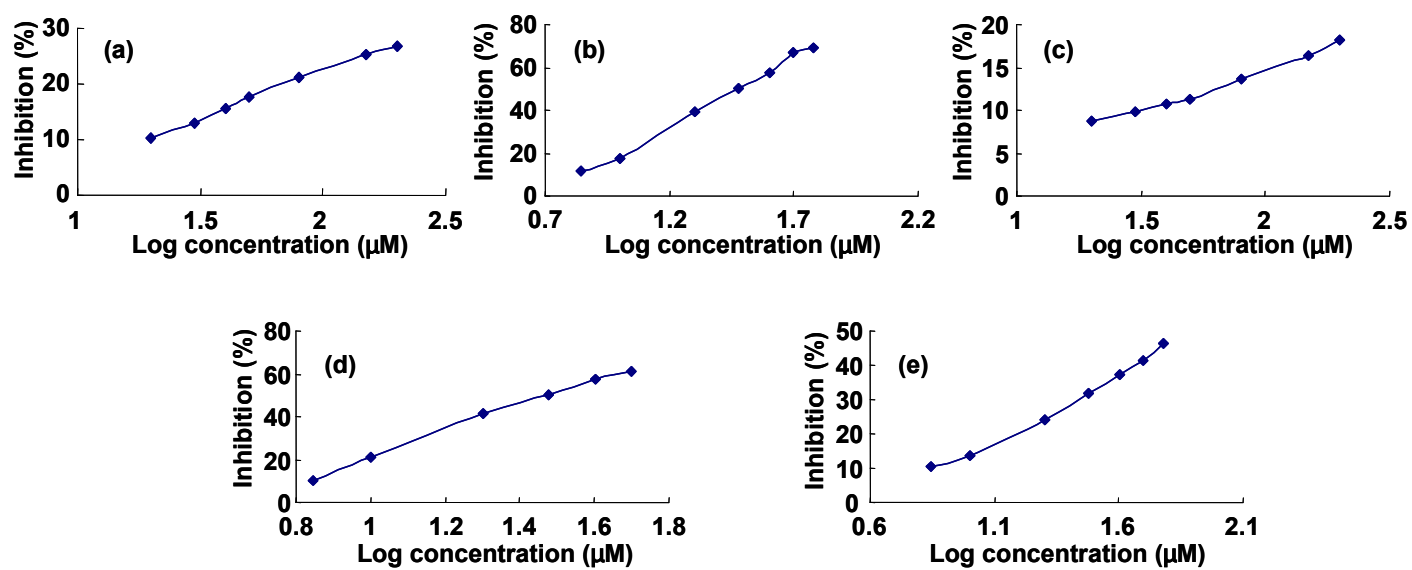

(a) chlorogenic acid, (b) oleuropein aglycone, (c) dicaffeoylquinic acid, (d) syringin and (e) rutin

**Fig. S3** Dose-dependent curves of kaempferol-3-*O*-rutinosidem, luteoloside, acteoside, isoacteoside and isoquercetin.

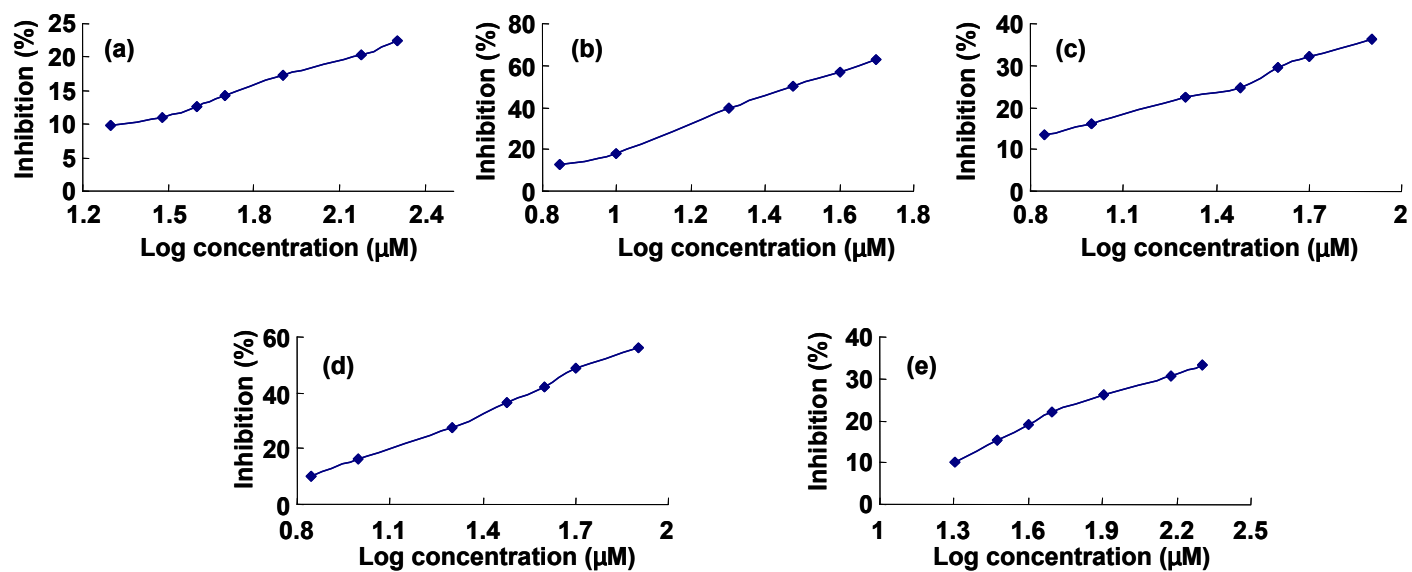

(a) kaempferol-3-*O*-rutinosidem, (b) luteoloside, (c) acteoside, (d) isoacteoside and (e) isoquercetin

**Fig. S4** Dose-dependent curves of astragalins, syringopicrosides, ligstrosides, oleuropein and syringopicroside aglycone.

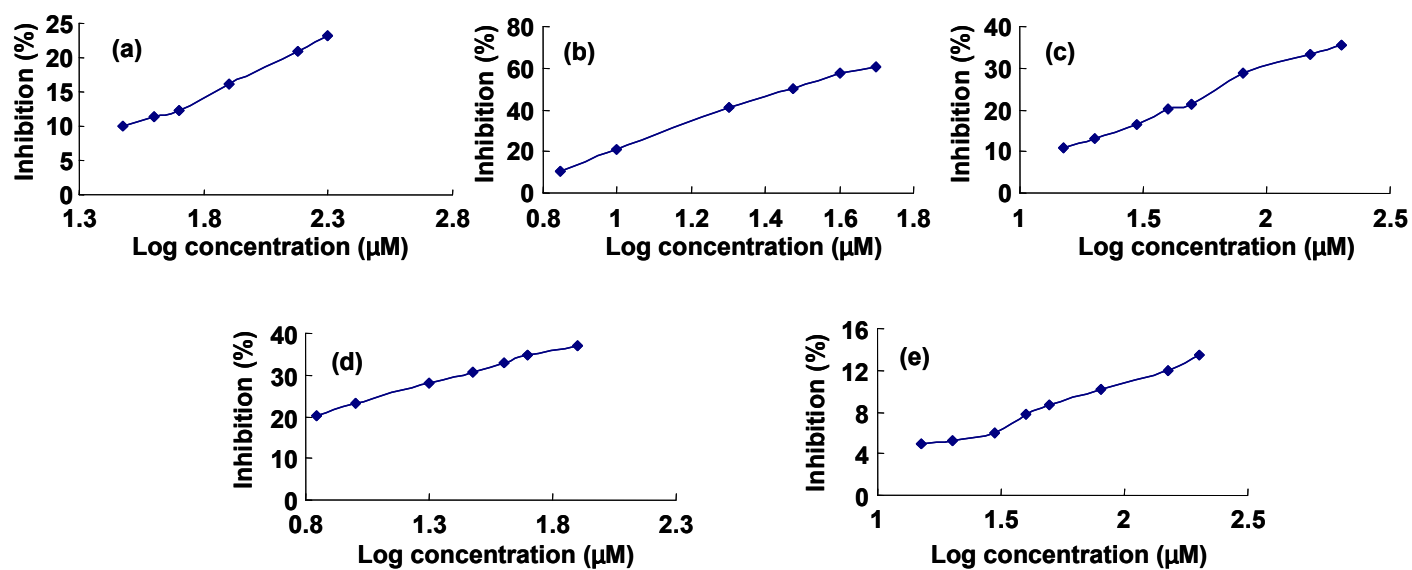

(a) astragalins, (b) syringopicrosides, (c) ligstrosides, (d) oleuropein and (e) syringopicroside aglycone

Table S1. Ultra-high performance liquid chromatography (UPLC)/PDA peak area of the compounds of the centrifugal partition chromatography (CPC) fractions 18–54 and the activities of the fractions.

| Fraction <sup>a</sup> | UPLC/PDA peak area (mAu/s) |              |                |              |           | activities ± S.D.<br>(n = 3) | The functions                                                       |
|-----------------------|----------------------------|--------------|----------------|--------------|-----------|------------------------------|---------------------------------------------------------------------|
|                       | luteoloside                | isoquercetin | astragalinalin | isoacteoside | acteoside |                              |                                                                     |
| 18                    | 15547                      | –            | –              | –            | –         | 24.56 % ± 2.65 %             | log 15547 • x <sub>7</sub> = 24.56% <sup>b</sup>                    |
| 19                    | 23521                      | –            | –              | –            | –         | 26.21 % ± 2.21 %             | log 23521 • x <sub>7</sub> = 26.21 %                                |
| 21                    | 33565                      | 1654         | –              | –            | –         | 30.92 % ± 2.46 %             | log 33565 • x <sub>7</sub> + log 1654 • x <sub>8</sub> = 30.92 %    |
| 22                    | 29378                      | 8998         | –              | –            | –         | 31.33 % ± 3.16 %             | log 29378 • x <sub>7</sub> + log 8998 • x <sub>8</sub> = 31.33 %    |
| 23                    | 23732                      | 19225        | –              | –            | –         | 32.08 % ± 3.21 %             | log 23732 • x <sub>7</sub> + log 19225 • x <sub>8</sub> = 32.08 %   |
| 24                    | 13034                      | 33365        | –              | –            | –         | 31.00 % ± 2.96 %             | log 13034 • x <sub>7</sub> + log 33365 • x <sub>8</sub> = 31.00 %   |
| 25                    | 8554                       | 36413        | –              | –            | –         | 30.04 % ± 2.67 %             | log 8554 • x <sub>7</sub> + log 36413 • x <sub>8</sub> = 30.04 %    |
| 26                    | 6332                       | 31554        | –              | –            | –         | 28.14 % ± 2.85 %             | log 6332 • x <sub>7</sub> + log 31554 • x <sub>8</sub> = 28.14 %    |
| 27                    | 1445                       | 20223        | –              | –            | –         | 24.56 % ± 2.46 %             | log 1445 • x <sub>7</sub> + log 20223 • x <sub>8</sub> = 24.56 %    |
| 28                    | 596                        | 8545         | –              | –            | –         | 22.50 % ± 2.13 %             | log 596 • x <sub>7</sub> + log 8545 • x <sub>8</sub> = 22.50 %      |
| 32                    | –                          | –            | 19665          | 565          | –         | 14.85 % ± 2.24 %             | log 19665 • x <sub>9</sub> + log 565 • x <sub>10</sub> = 14.85 %    |
| 33                    | –                          | –            | 22565          | 1022         | –         | 15.38 % ± 2.03 %             | log 22565 • x <sub>9</sub> + log 1022 • x <sub>10</sub> = 15.38 %   |
| 34                    | –                          | –            | 18554          | 6552         | –         | 18.75 % ± 2.06 %             | log 18554 • x <sub>9</sub> + log 6552 • x <sub>10</sub> = 18.75 %   |
| 35                    | –                          | –            | 9954           | 10221        | –         | 20.02 % ± 1.96 %             | log 9954 • x <sub>9</sub> + log 10221 • x <sub>10</sub> = 20.20 %   |
| 36                    | –                          | –            | 6521           | 28251        | –         | 21.21 % ± 2.64 %             | log 6521 • x <sub>9</sub> + log 28251 • x <sub>10</sub> = 21.21 %   |
| 37                    | –                          | –            | 1225           | 40445        | –         | 21.48 % ± 2.87 %             | log 1225 • x <sub>9</sub> + log 40445 • x <sub>10</sub> = 21.48 %   |
| 38                    | –                          | –            | 685            | 47998        | –         | 21.94 % ± 2.36 %             | log 685 • x <sub>9</sub> + log 47998 • x <sub>10</sub> = 21.94 %    |
| 40                    | –                          | –            | –              | 54738        | –         | 19.47% ± 2.25 %              | log 54738 • x <sub>10</sub> = 19.47 %                               |
| 41                    | –                          | –            | –              | 55445        | –         | 19.05% ± 2.51 %              | log 55445 • x <sub>10</sub> = 19.05 %                               |
| 42                    | –                          | –            | –              | 54665        | –         | 20.12% ± 2.27 %              | log 54665 • x <sub>10</sub> = 20.12%                                |
| 43                    | –                          | –            | –              | 52544        | –         | 19.11% ± 2.68 %              | log 52544 • x <sub>10</sub> = 19.11 %                               |
| 44                    | –                          | –            | –              | 50022        | –         | 18.75% ± 2.55 %              | log 50022 • x <sub>10</sub> = 18.75 %                               |
| 45                    | –                          | –            | –              | 48541        | –         | 18.45% ± 2.31 %              | log 48541 • x <sub>10</sub> = 18.45 %                               |
| 46                    | –                          | –            | –              | 42155        | –         | 18.10 % ± 2.29 %             | log 42155 • x <sub>10</sub> = 18.10 %                               |
| 49                    | –                          | –            | –              | 34312        | 520       | 23.12 % ± 2.65 %             | log 34312 • x <sub>10</sub> + log 520 • x <sub>11</sub> = 23.12 %   |
| 50                    | –                          | –            | –              | 25221        | 3545      | 24.61 % ± 2.65 %             | log 25221 • x <sub>10</sub> + log 3545 • x <sub>11</sub> = 23.12 %  |
| 51                    | –                          | –            | –              | 16866        | 9331      | 24.44 % ± 2.14 %             | log 16866 • x <sub>10</sub> + log 9331 • x <sub>11</sub> = 23.12 %  |
| 52                    | –                          | –            | –              | 10021        | 10011     | 22.89 % ± 2.29 %             | log 10021 • x <sub>10</sub> + log 10011 • x <sub>11</sub> = 23.12 % |
| 53                    | –                          | –            | –              | 8875         | 3995      | 21.71 % ± 2.45 %             | log 8875 • x <sub>10</sub> + log 3995 • x <sub>11</sub> = 23.12 %   |
| 54                    | –                          | –            | –              | 7532         | 823       | 17.99 % ± 1.95 %             | log 7532 • x <sub>10</sub> + log 823 • x <sub>11</sub> = 17.99 %    |

<sup>a</sup> Since the analysis error of the compound with peak areas less than 500 was relatively large, the fractions that contain the compounds with a peak area less than 500 were omitted.

<sup>b</sup> x<sub>7</sub>–x<sub>11</sub>: the tyrosinase inhibition ability coefficients of luteoloside, isoquercetin, astragalinalin, isoacteoside, and acteoside, respectively.

Table S2. Ultra-high performance liquid chromatography (UPLC)/PDA peak area of the compounds of the centrifugal partition chromatography (CPC) fractions 57–99 and the activities of the fractions.

| fraction <sup>a</sup> | UPLC/PDA peak area (mAu/s) |                  |             |            |                           | activities<br>(n=3) | the functions                                                                                                 |
|-----------------------|----------------------------|------------------|-------------|------------|---------------------------|---------------------|---------------------------------------------------------------------------------------------------------------|
|                       | isoacteoside               | syringopicroside | ligstroside | oleuropein | syringopicroside aglycone |                     |                                                                                                               |
| 57                    | 1821                       | 1654             | –           | –          | –                         | 29.35 % ± 2.29 %    | $\log 1821 \cdot x_{10} + \log 1654 \cdot x_{12} = 29.35\%$ <sup>b</sup>                                      |
| 58                    | 984                        | 3198             | –           | –          | –                         | 29.22 % ± 2.45 %    | $\log 984 \cdot x_{10} + \log 3198 \cdot x_{12} = 29.32\%$                                                    |
| 59                    | 565                        | 5725             | –           | –          | –                         | 29.84 % ± 2.82 %    | $\log 565 \cdot x_{10} + \log 5725 \cdot x_{12} = 29.84\%$                                                    |
| 70                    | –                          | 29664            | –           | –          | –                         | 23.45 % ± 2.84 %    | $\log 29664 \cdot x_{12} = 23.45\%$                                                                           |
| 64                    | –                          | 35223            | –           | –          | –                         | 23.25 % ± 2.75 %    | $\log 35223 \cdot x_{12} = 23.25\%$                                                                           |
| 65                    | –                          | 42554            | –           | –          | –                         | 23.60 % ± 2.94 %    | $\log 42554 \cdot x_{12} = 23.60\%$                                                                           |
| 66                    | –                          | 49854            | –           | –          | –                         | 23.95 % ± 2.75 %    | $\log 49854 \cdot x_{12} = 23.95\%$                                                                           |
| 69                    | –                          | 56221            | –           | –          | –                         | 24.15 % ± 2.68 %    | $\log 56221 \cdot x_{12} = 24.15\%$                                                                           |
| 70                    | –                          | 58225            | –           | –          | –                         | 24.51 % ± 2.33 %    | $\log 58225 \cdot x_{12} = 24.51\%$                                                                           |
| 71                    | –                          | 63221            | –           | –          | –                         | 24.33 % ± 2.45 %    | $\log 63221 \cdot x_{12} = 24.33\%$                                                                           |
| 72                    | –                          | 64574            | –           | –          | –                         | 24.85 % ± 2.16 %    | $\log 64574 \cdot x_{12} = 24.85\%$                                                                           |
| 73                    | –                          | 62221            | –           | –          | –                         | 24.22 % ± 2.25 %    | $\log 62221 \cdot x_{12} = 24.22\%$                                                                           |
| 74                    | –                          | 60221            | –           | –          | –                         | 23.65 % ± 2.34 %    | $\log 60221 \cdot x_{12} = 23.65\%$                                                                           |
| 75                    | –                          | 58665            | –           | –          | –                         | 23.55 % ± 2.41 %    | $\log 58665 \cdot x_{12} = 23.55\%$                                                                           |
| 76                    | –                          | 52336            | –           | –          | –                         | 22.84 % ± 2.18 %    | $\log 52336 \cdot x_{12} = 22.84\%$                                                                           |
| 77                    | –                          | 42114            | –           | –          | –                         | 22.06 % ± 1.94 %    | $\log 42114 \cdot x_{12} = 22.06\%$                                                                           |
| 78                    | –                          | 28223            | –           | –          | –                         | 21.22 % ± 2.27 %    | $\log 28223 \cdot x_{12} = 21.22\%$                                                                           |
| 79                    | –                          | 18545            | –           | –          | –                         | 21.39 % ± 2.21 %    | $\log 18545 \cdot x_{12} = 21.39\%$                                                                           |
| 82                    | –                          | 11021            | 685         | –          | –                         | 26.15 % ± 2.54 %    | $\log 11021 \cdot x_{12} + \log 685 \cdot x_{13} = 26.15\%$                                                   |
| 83                    | –                          | 8458             | 854         | –          | –                         | 25.68 % ± 2.92 %    | $\log 8458 \cdot x_{12} + \log 854 \cdot x_{13} = 25.68\%$                                                    |
| 88                    | –                          | 5556             | 1321        | –          | 552                       | 35.54 % ± 3.05 %    | $\log 5556 \cdot x_{12} + \log 1321 \cdot x_{13} + \log 552 \cdot x_{15} = 35.54\%$                           |
| 89                    | –                          | 4221             | 1822        | –          | 568                       | 35.21 % ± 3.11 %    | $\log 4221 \cdot x_{12} + \log 1822 \cdot x_{13} + \log 568 \cdot x_{15} = 35.21\%$                           |
| 90                    | –                          | 3021             | 4552        | –          | 985                       | 36.15 % ± 2.98 %    | $\log 3021 \cdot x_{12} + \log 4552 \cdot x_{13} + \log 985 \cdot x_{15} = 36.15\%$                           |
| 96                    | –                          | 865              | 9665        | 1021       | 2654                      | 39.71 % ± 3.45 %    | $\log 865 \cdot x_{12} + \log 9665 \cdot x_{13} + \log 1021 \cdot x_{14} + \log 2654 \cdot x_{15} = 39.71\%$  |
| 97                    | –                          | 665              | 10313       | 2554       | 2221                      | 40.23 % ± 3.27 %    | $\log 665 \cdot x_{12} + \log 10313 \cdot x_{13} + \log 2554 \cdot x_{14} + \log 2221 \cdot x_{15} = 40.23\%$ |
| 98                    | –                          | 632              | 9752        | 4328       | 1254                      | 40.71 % ± 2.98 %    | $\log 632 \cdot x_{12} + \log 9752 \cdot x_{13} + \log 4328 \cdot x_{14} + \log 1254 \cdot x_{15} = 40.71\%$  |

<sup>a</sup> Since the analysis error of the compound with peak areas less than 500 was relatively large, the fractions that contain the compounds with a peak area less than 500 were omitted.

<sup>b</sup>  $x_{10}, x_{12}-x_{15}$ : the tyrosinase inhibition ability coefficients of isoacteoside, syringopicroside, ligstroside, oleuropein, and syringopicroside aglycone, respectively.
